# Supplementary material
Source: PubMed Central journal article supplement (PMC3115420)
Supplement: Supp_Data.pdf [file Supp_Data.pdf]

## Supplementary Data

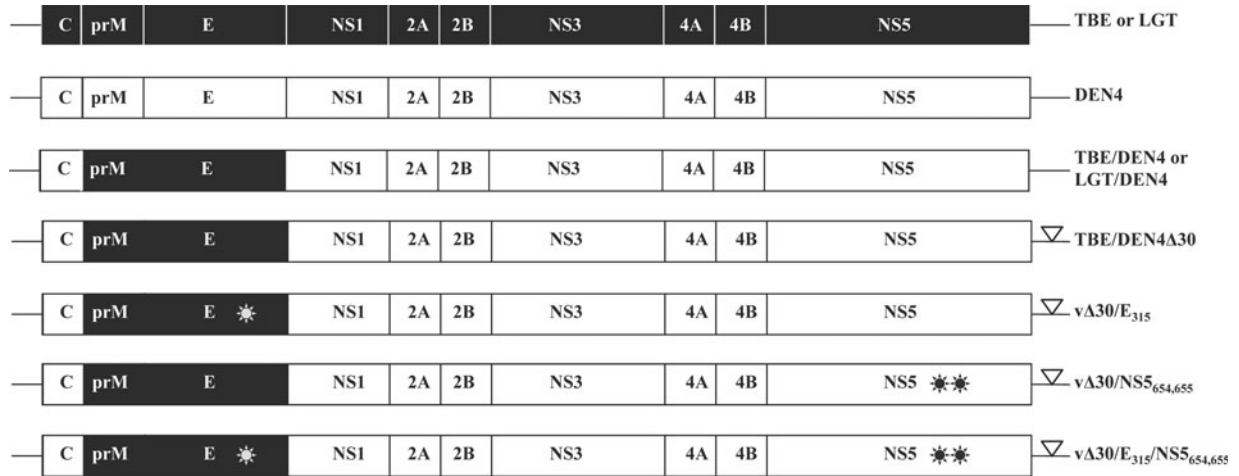

**SUPPLEMENTARY FIG. S1.** Schematic representation of parental and chimeric viruses used in this study. Shading represents the sequence source. White, DEN4 virus; black, TBEV or LGT virus. (∇) represents the Δ30 mutation; (\*) and (\*\*) represents the E<sub>315</sub>, NS<sub>5654</sub>, and NS<sub>5655</sub> mutations. DEN4, dengue 4; LGT, Langat; TBEV, tick-borne encephalitis virus.
